# Supplementary material
Source: PubMed Central journal article supplement (PMC4164021)
Supplement: NIHMS620840-supplement-Supplemental_Table_1.pdf [file NIHMS620840-supplement-Supplemental_Table_1.pdf]

**Supplemental Table 1: Family, Maternal and Paternal Lifetime Psychiatric History\***

|                                                                                          | <b>Class 1</b><br>predominantly<br>euthymic<br>(n=88) | <b>Class 2</b><br>moderately<br>euthymic<br>(n=127) | <b>Class 3</b><br>ill with improving<br>course<br>(n=70) | <b>Class 4</b><br>predominantly ill<br>(n=82) | stat<br>( $\chi^2$ ) | p      |
|------------------------------------------------------------------------------------------|-------------------------------------------------------|-----------------------------------------------------|----------------------------------------------------------|-----------------------------------------------|----------------------|--------|
| <b>Lifetime Family Psychiatric History (1<sup>st</sup> or 2<sup>nd</sup> degree) (%)</b> |                                                       |                                                     |                                                          |                                               |                      |        |
| Lifetime BP                                                                              | 36.4 <sup>2,4</sup>                                   | 63.0 <sup>1</sup>                                   | 51.4                                                     | 72.0 <sup>1</sup>                             | 25.38                | <.001  |
| Lifetime Depression/Dysthymia                                                            | 55.7 <sup>2,4</sup>                                   | 72.2 <sup>1</sup>                                   | 68.6                                                     | 75.6 <sup>1</sup>                             | 9.96                 | 0.02   |
| Lifetime Anxiety disorder                                                                | 52.3 <sup>2,4</sup>                                   | 71.7 <sup>1</sup>                                   | 68.6                                                     | 78.1 <sup>1</sup>                             | 14.56                | 0.002  |
| Lifetime Non-Mood Psychosis                                                              | 1.1                                                   | 0.8                                                 | 0                                                        | 1.2                                           | -                    | 1      |
| ADHD                                                                                     | 22.7 <sup>2,3,4</sup>                                 | 42.5 <sup>1,4</sup>                                 | 58.6 <sup>1</sup>                                        | 63.4 <sup>1,2</sup>                           | 34.29                | <.001  |
| Conduct disorder                                                                         | 18.2 <sup>4</sup>                                     | 33.9 <sup>4</sup>                                   | 35.7                                                     | 53.7 <sup>1,2</sup>                           | 23.61                | <.001  |
| Substance use disorder                                                                   | 53.4 <sup>4</sup>                                     | 68.5 <sup>4</sup>                                   | 71.4                                                     | 87.8 <sup>1,2</sup>                           | 23.99                | <.001  |
| Suicide attempt                                                                          | 28.4 <sup>2,3,4</sup>                                 | 44.1 <sup>1</sup>                                   | 44.3 <sup>1</sup>                                        | 50.0 <sup>1</sup>                             | 9.21                 | 0.02   |
| <b>Mother's lifetime psychiatric history (% of subjects)</b>                             |                                                       |                                                     |                                                          |                                               |                      |        |
| Lifetime BP                                                                              | 14.3 <sup>4</sup>                                     | 19.7                                                | 19.7                                                     | 32.1 <sup>1</sup>                             | 8.42                 | 0.04   |
| Lifetime Depression/Dysthymia                                                            | 47.6 <sup>2,4</sup>                                   | 70.9 <sup>1</sup>                                   | 68.2                                                     | 76.5 <sup>1</sup>                             | 18.19                | 0.0004 |
| Lifetime Anxiety disorder                                                                | 28.6 <sup>4</sup>                                     | 37.8                                                | 34.9                                                     | 49.4 <sup>1</sup>                             | 7.92                 | 0.05   |
| Lifetime Non-Mood Psychosis                                                              | -                                                     | -                                                   | -                                                        | -                                             | -                    | -      |
| ADHD                                                                                     | 2.4 <sup>4</sup>                                      | 9.5                                                 | 13.6                                                     | 19.8 <sup>1</sup>                             | 13.60                | 0.004  |
| Conduct disorder                                                                         | 0                                                     | 3.9                                                 | 6.1                                                      | 6.2                                           | -                    | 0.08   |
| Substance use disorder                                                                   | 9.5 <sup>4</sup>                                      | 18.9                                                | 19.7                                                     | 27.2 <sup>1</sup>                             | 8.51                 | 0.04   |
| Suicide attempt                                                                          | 9.5                                                   | 11.8                                                | 15.2                                                     | 21.0                                          | 5.27                 | 0.2    |
| <b>Father's lifetime psychiatric history (% of subjects)</b>                             |                                                       |                                                     |                                                          |                                               |                      |        |
| Lifetime BP                                                                              | 12.2 <sup>4</sup>                                     | 16.7                                                | 21.2                                                     | 30.0 <sup>1</sup>                             | 9.18                 | 0.03   |
| Lifetime Depression/Dysthymia                                                            | 35.4                                                  | 54.0                                                | 42.4                                                     | 41.3                                          | 7.79                 | 0.05   |
| Lifetime Anxiety disorder                                                                | 4.9 <sup>4</sup>                                      | 15.1                                                | 18.2                                                     | 30.0 <sup>1</sup>                             | 18.78                | 0.0003 |
| Lifetime Non-Mood Psychosis                                                              | 0                                                     | 0                                                   | 0                                                        | 1.3                                           | -                    | 0.4    |
| ADHD                                                                                     | 7.3 <sup>4</sup>                                      | 13.5                                                | 13.6                                                     | 27.5 <sup>1</sup>                             | 13.71                | 0.003  |
| Conduct disorder                                                                         | 4.9 <sup>4</sup>                                      | 11.1 <sup>4</sup>                                   | 16.7                                                     | 26.3 <sup>1,2</sup>                           | 16.77                | 0.0008 |
| Substance use disorder                                                                   | 22.0 <sup>3,4</sup>                                   | 31.0 <sup>4</sup>                                   | 42.4 <sup>1</sup>                                        | 60.0 <sup>1,2</sup>                           | 28.70                | <.001  |
| Suicide attempt                                                                          | 9.8                                                   | 9.5                                                 | 4.6                                                      | 15.0                                          | 4.48                 | 0.2    |

\*Superscripts denote significant between class differences with p values  $\leq 0.05$  after Bonferroni corrections

ADHD: Attention Deficit Hyperactive Disorder; CBQ: Conflict Behavior Questionnaire; FACES: Family Adaptability and Cohesion Evaluation Scale-II
