# Supplementary material
Source: PubMed Central journal article supplement (PMC4164021)
Supplement: NIHMS620840-supplement-Supplemntal_Table_2.pdf [file NIHMS620840-supplement-Supplemntal_Table_2.pdf]

**Supplemental Table 2: Maternal and Paternal overall functioning and treatment and Family Functioning at Baseline\***

|                                                        | <b>Class 1</b><br>predominantly<br>euthymic<br>(n=88) | <b>Class 2</b><br>moderately<br>euthymic<br>(n=127) | <b>Class 3</b><br>ill with improving<br>course<br>(n=70) | <b>Class 4</b><br>predominantly ill<br>(n=82) | stat<br>( $\chi^2$ ) | p      |
|--------------------------------------------------------|-------------------------------------------------------|-----------------------------------------------------|----------------------------------------------------------|-----------------------------------------------|----------------------|--------|
| <b>Primary caretaker overall functioning (GAF)</b>     |                                                       |                                                     |                                                          |                                               |                      |        |
| Current score                                          | 75.3 ± 14.0 <sup>4</sup>                              | 70.8 ± 11.5 <sup>4</sup>                            | 71.3 ± 13.2 <sup>4</sup>                                 | 65.5 ± 13.8 <sup>1,2,3</sup>                  | 7.99                 | <.001  |
| Most severe past score                                 | 56.7 ± 20.0 <sup>4</sup>                              | 50.6 ± 17.3                                         | 52.4 ± 17.8                                              | 46.7 ± 18.6 <sup>1</sup>                      | 4.13                 | 0.007  |
| Highest past level                                     | 82.3 ± 10.5 <sup>4</sup>                              | 79.0 ± 12.5                                         | 79.0 ± 10.3                                              | 74.9 ± 13.5 <sup>1</sup>                      | 5.46                 | 0.001  |
| <b>Parental history of psychiatric treatment (%)**</b> |                                                       |                                                     |                                                          |                                               |                      |        |
| Mother                                                 |                                                       |                                                     |                                                          |                                               |                      |        |
| Overall Treatment                                      | 55.1 <sup>3,4</sup>                                   | 69.5                                                | 80.4 <sup>1</sup>                                        | 82.6 <sup>1</sup>                             | 16.46                | 0.0009 |
| Outpatient                                             | 51.3 <sup>3,4</sup>                                   | 67.8                                                | 75.0 <sup>1</sup>                                        | 81.2 <sup>1</sup>                             | 16.75                | 0.0008 |
| Inpatient                                              | 14.1 <sup>4</sup>                                     | 16.1 <sup>4</sup>                                   | 23.2                                                     | 33.3 <sup>1,2</sup>                           | 10.56                | 0.01   |
| Father                                                 |                                                       |                                                     |                                                          |                                               |                      |        |
| Overall Treatment                                      | 33.8                                                  | 45.9                                                | 53.7                                                     | 49.3                                          | 5.94                 | 0.1    |
| Outpatient                                             | 29.7 <sup>3</sup>                                     | 42.2                                                | 53.7 <sup>1</sup>                                        | 43.3                                          | 7.65                 | 0.05   |
| Inpatient                                              | 12.2                                                  | 13.8                                                | 14.8                                                     | 26.9                                          | 6.96                 | 0.07   |
| <b>Family Functioning and Conflicts at Baseline</b>    |                                                       |                                                     |                                                          |                                               |                      |        |
| FACES                                                  |                                                       |                                                     |                                                          |                                               |                      |        |
| Cohesion-Child                                         | 58.1 ± 13.7                                           | 55.7 ± 11.2                                         | 55.2 ± 11.9                                              | 55.9 ± 14.1                                   | F=0.75               | 0.5    |
| Cohesion-Parent                                        | 58.5 ± 12.1                                           | 60.1 ± 10.2                                         | 57.6 ± 11.7                                              | 59.6 ± 10.0                                   | F=0.87               | 0.5    |
| Adaptability-Child                                     | 46.0 ± 10.7                                           | 43.5 ± 8.2                                          | 43.5 ± 8.1                                               | 44.3 ± 9.1                                    | F=1.32               | 0.3    |
| Adaptability-Parent                                    | 46.6 ± 7.9                                            | 45.2 ± 6.8                                          | 44.5 ± 7.3                                               | 45.8 ± 7.1                                    | F=1.18               | 0.3    |
| CBQ                                                    |                                                       |                                                     |                                                          |                                               |                      |        |
| Child                                                  | 8.4 ± 6.2                                             | 7.9 ± 5.6                                           | 9.1 ± 6.2                                                | 8.1 ± 5.4                                     | F=0.61               | 0.6    |
| Parent                                                 | 10.3 ± 7.0 <sup>3</sup>                               | 10.3 ± 5.5 <sup>3</sup>                             | 13.6 ± 5.3 <sup>1,2</sup>                                | 12.1 ± 4.6                                    | F=5.90               | 0.0006 |

\*Superscripts denote significant between class differences with p values ≤ 0.05 after Bonferroni corrections

ADHD: Attention Deficit Hyperactive Disorder; CBQ: Conflict Behavior Questionnaire; FACES: Family Adaptability and Cohesion Evaluation Scale-II
